# Supplementary material for: Sustainable UV-Crosslinkable Acrylic Pressure-Sensitive Adhesives for Medical Application
Source: MDPI journal article supplement (doi:10.3390/ijms222111840), 2021-10-31
Supplement: s1 [file s1]

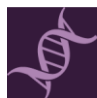

Supplementary Materials

# Sustainable UV-crosslinkable acrylic pressure-sensitive adhesives for medical application

Paula Ossowicz-Rupniewska <sup>1,\*</sup>, Paulina Bednarczyk <sup>1</sup>, Małgorzata Nowak <sup>1</sup>, Anna Nowak <sup>2</sup>, Wiktoria Duchnik <sup>2</sup>, Łukasz Kucharski <sup>2</sup>, Joanna Rokicka <sup>1</sup>, Adam Klimowicz <sup>2</sup>, Zbigniew Czech <sup>1</sup>

<sup>1</sup> West Pomeranian University of Technology in Szczecin, Faculty of Chemical Technology and Engineering, Department of Chemical Organic Technology and Polymeric Materials, Piastów Ave. 42, PL-71065 Szczecin, Poland; bednarczyk.pb@gmail.com (P.B.); gosia.nowak.zut@gmail.com (M.N.); psa\_czech@wp.pl (Z.C.)

<sup>2</sup> Pomeranian Medical University in Szczecin, Department of Cosmetic and Pharmaceutical Chemistry, Powstańców Wielkopolskich Ave. 72, PL 70111 Szczecin, Poland; anowak@pum.edu.pl (A.N.); wiktoria.duchnik@pum.edu.pl (W.D.); lukasz.kucharski@pum.edu.pl (Ł.K.); adklim@pum.edu.pl (A.K.)

\* Correspondence: possowicz@zut.edu.pl; Tel.: +48 914494801

**Citation:** Ossowicz-Rupniewska, P.; Bednarczyk, P.; Nowak, M.; Nowak, A.; Duchnik, W.; Kucharski, Ł.; Rokicka, J.; Klimowicz, A.; Czech, Z. Sustainable UV-crosslinkable acrylic pressure-sensitive adhesives for medical application. *Int. J. Mol. Sci.* **2021**, *22*, 11840. <https://doi.org/10.3390/ijms222111840>

**Publisher's Note:** MDPI stays neutral with regard to jurisdictional claims in published maps and institutional affiliations.

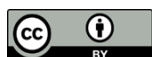

**Copyright:** © 2021 by the authors. Submitted for possible open access publication under the terms and conditions of the Creative Commons Attribution (CC BY) license (<https://creativecommons.org/licenses/by/4.0/>).

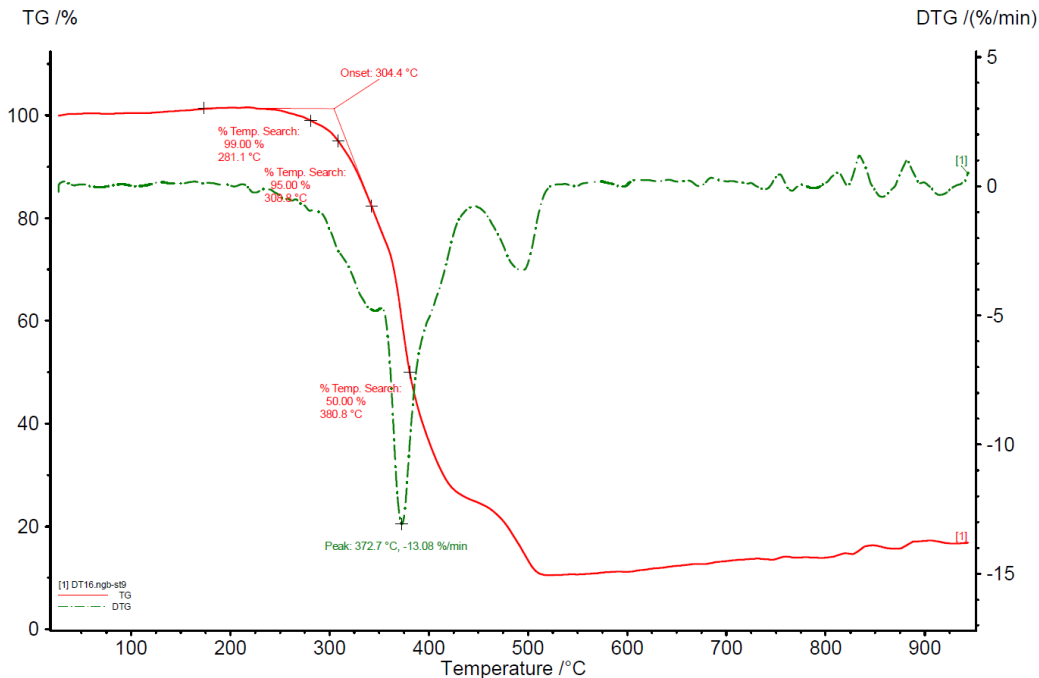

**Figure S1.** The TG and DTG curves of DT16.

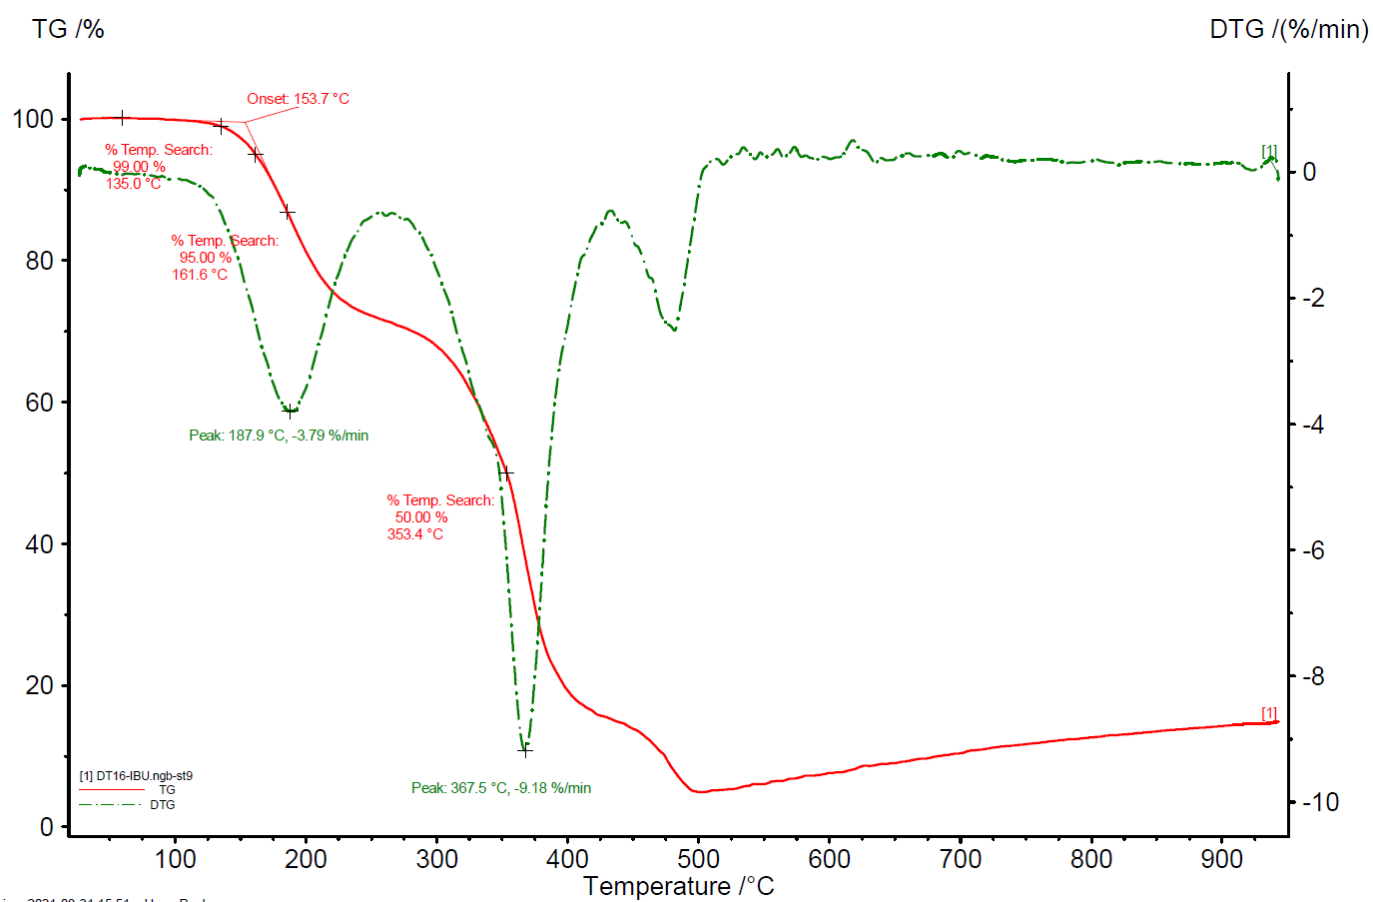

Main 2021-08-31 15:51 User: Paula

**Figure S2.** The TG and DTG curves of DT16-IBU.

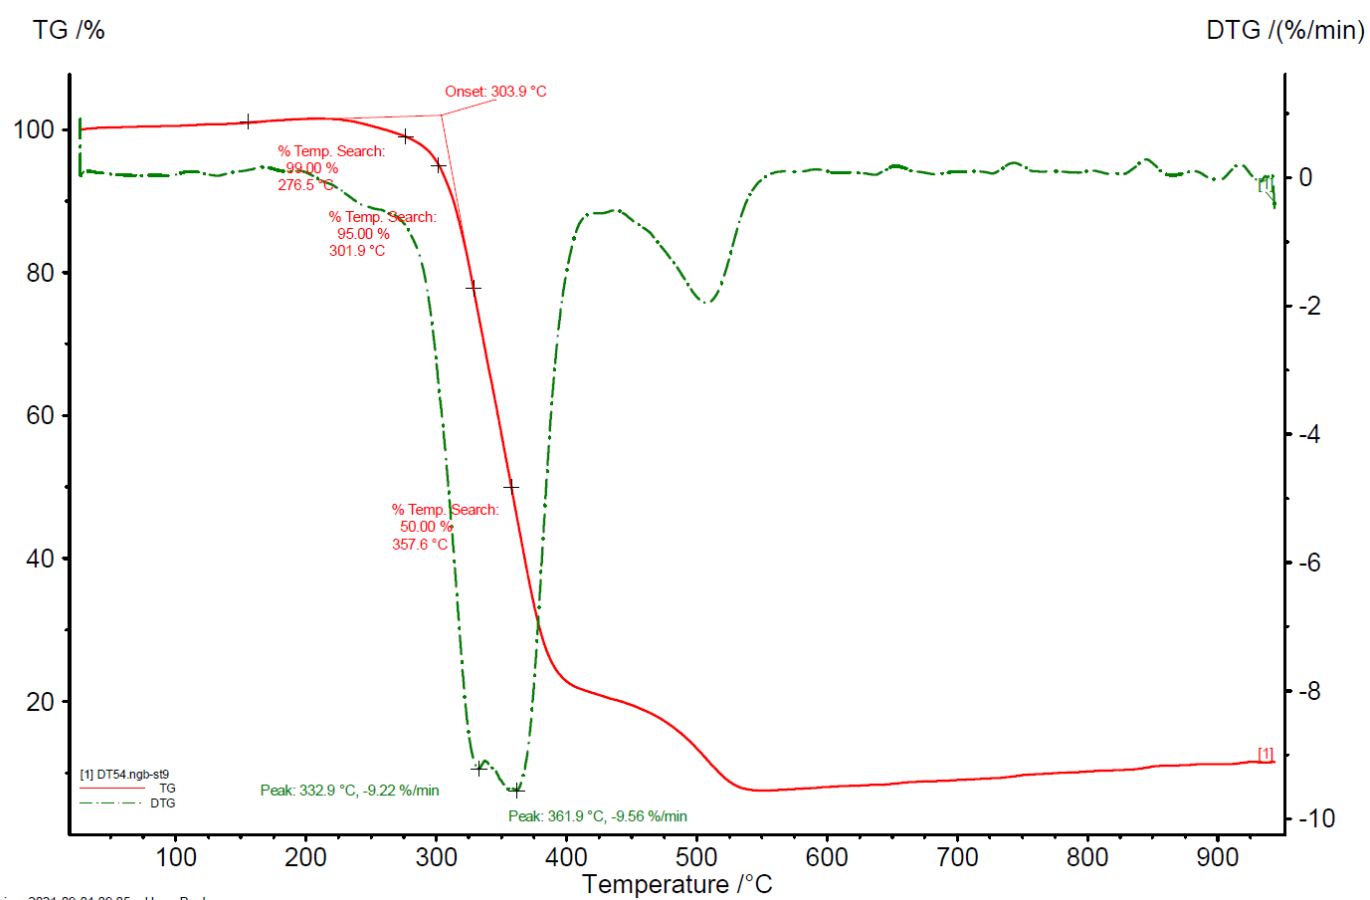

Main 2021-09-01 09:05 User: Paula

**Figure S3.** The TG and DTG curves of DT54.

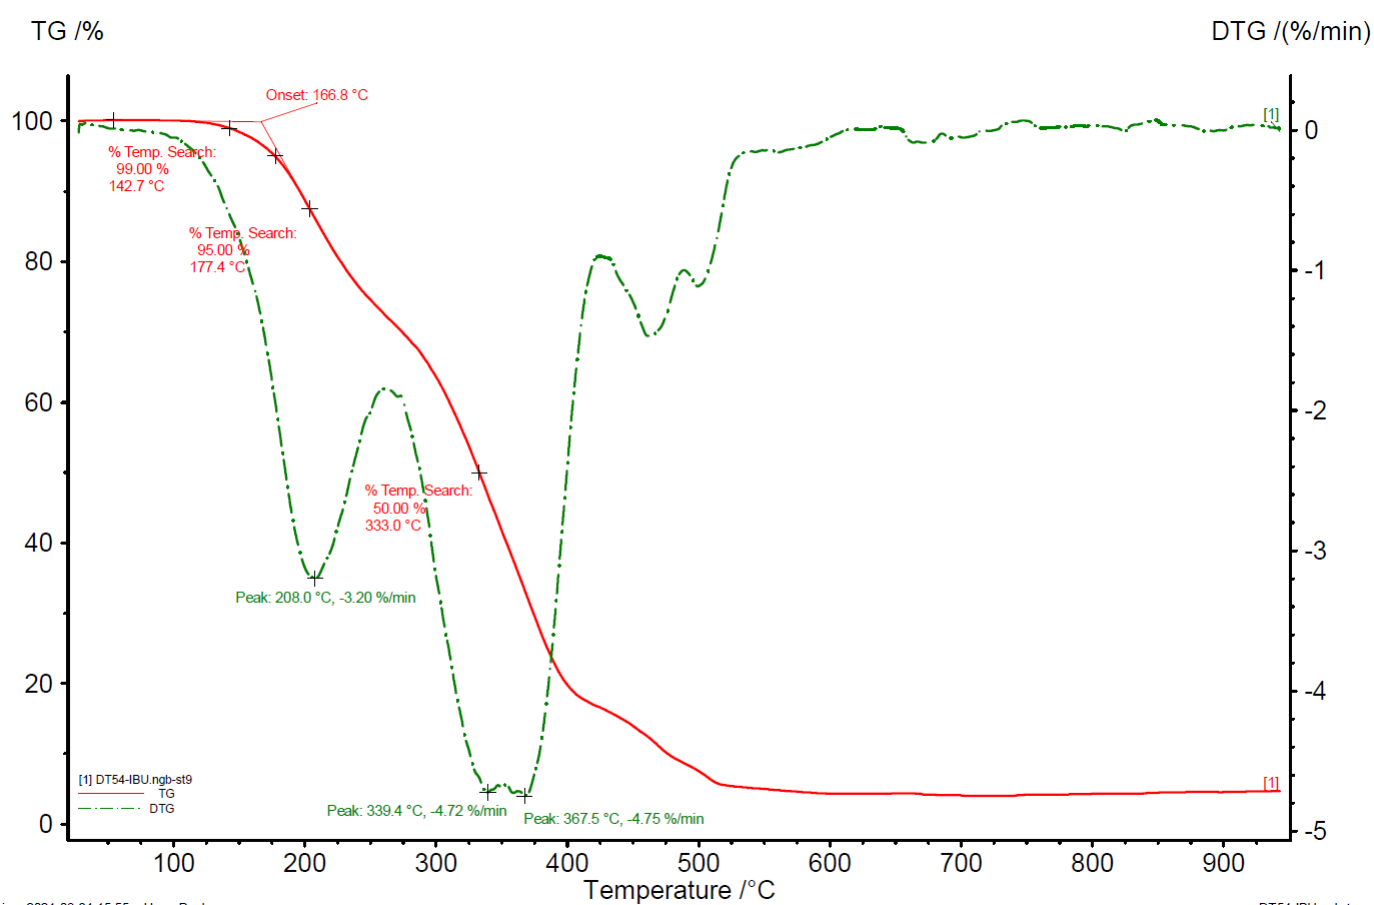

Main 2021-08-31 15:55 User: Paula

DT54-IBU.ngb-taa

**Figure S4.** The TG and DTG curves of DT54-IBU.

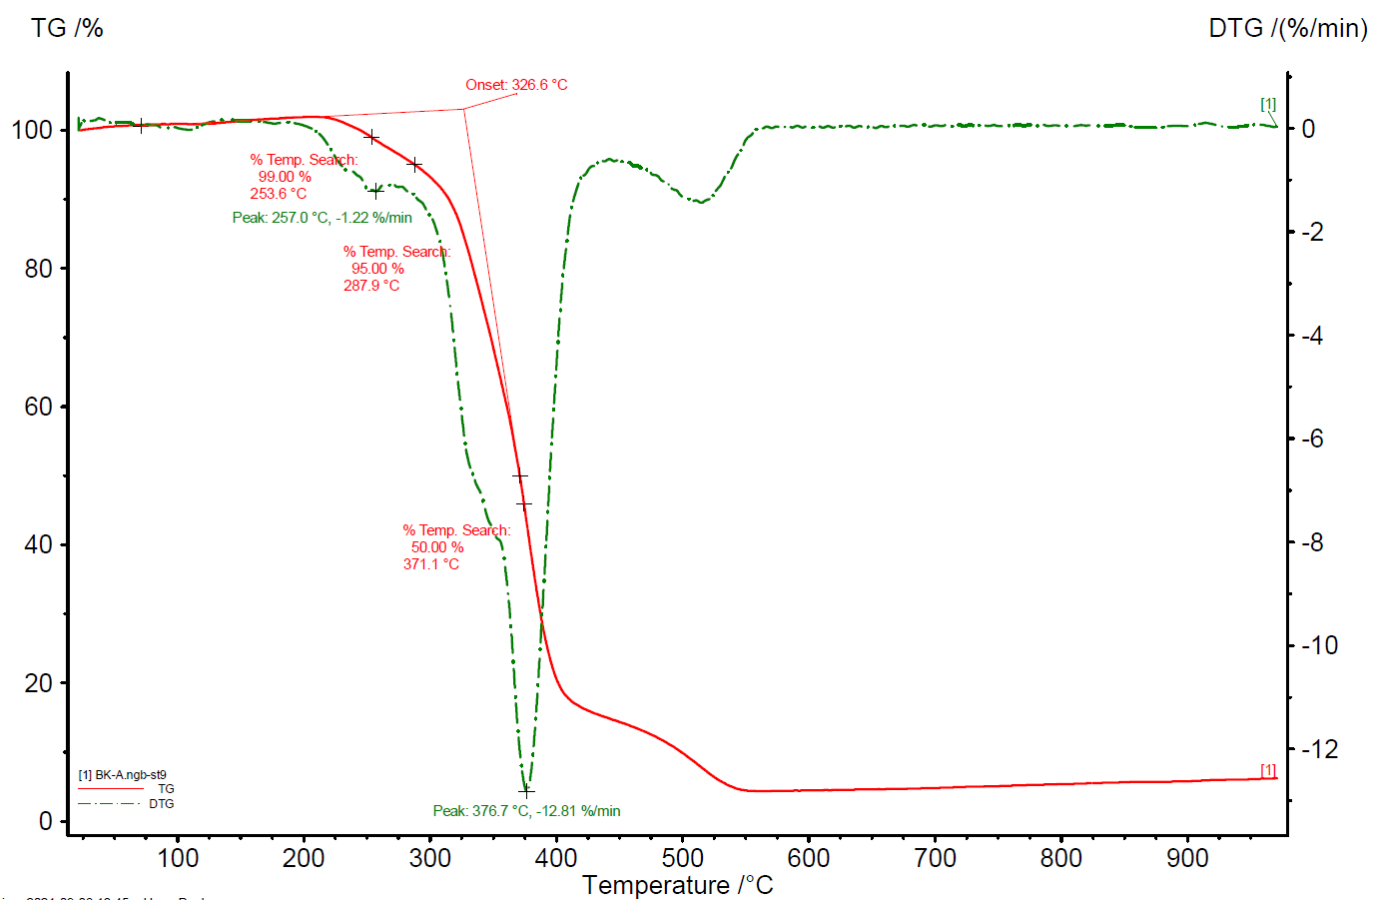

Main 2021-09-08 13:45 User: Paula

**Figure S5.** The TG and DTG curves of BK-A.

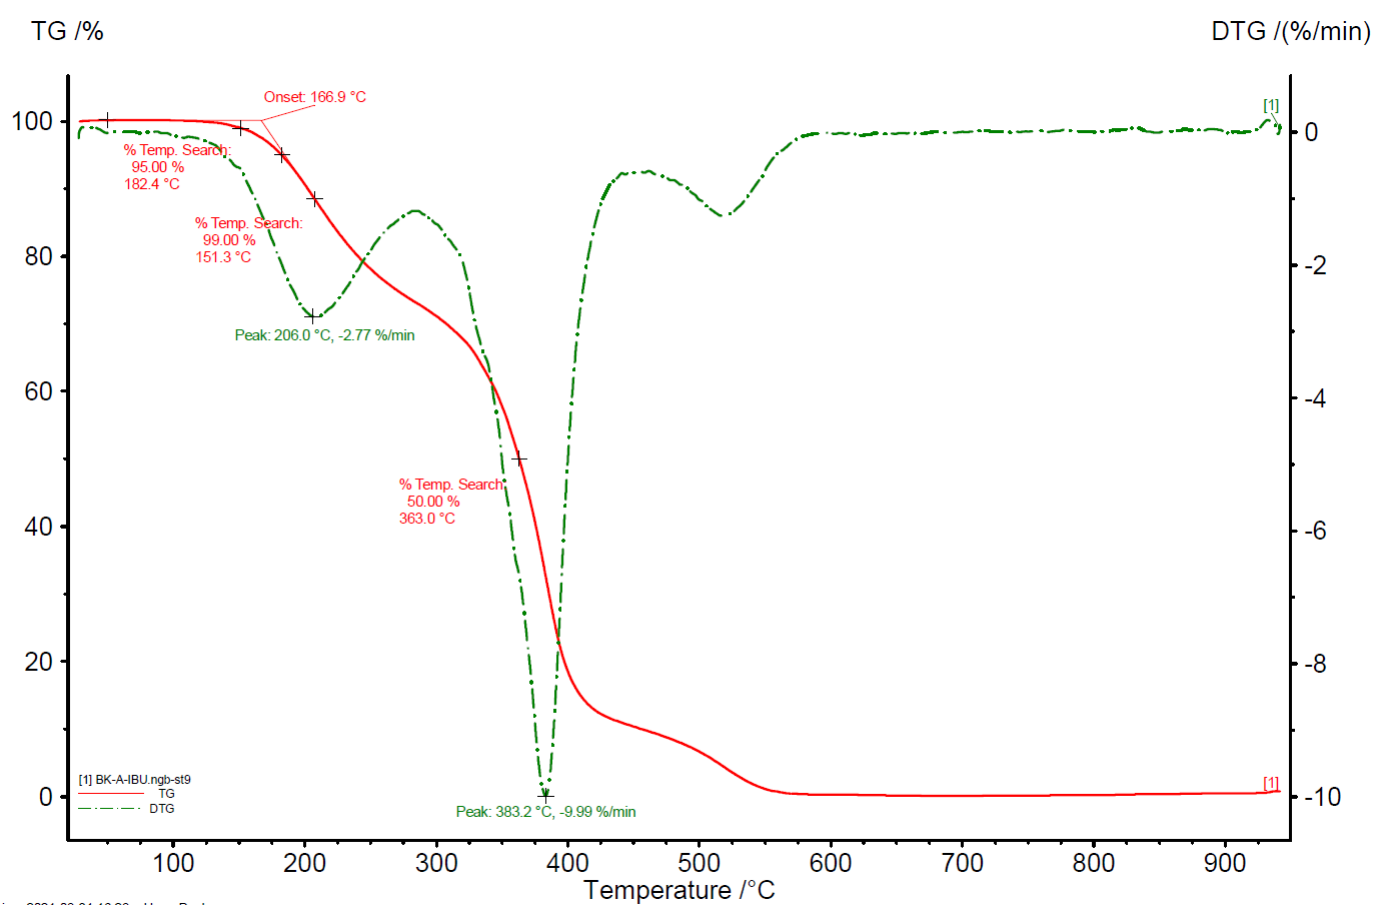

Main 2021-08-31 16:28 User: Paula

**Figure S6.** The TG and DTG curves of BK-A-IBU.

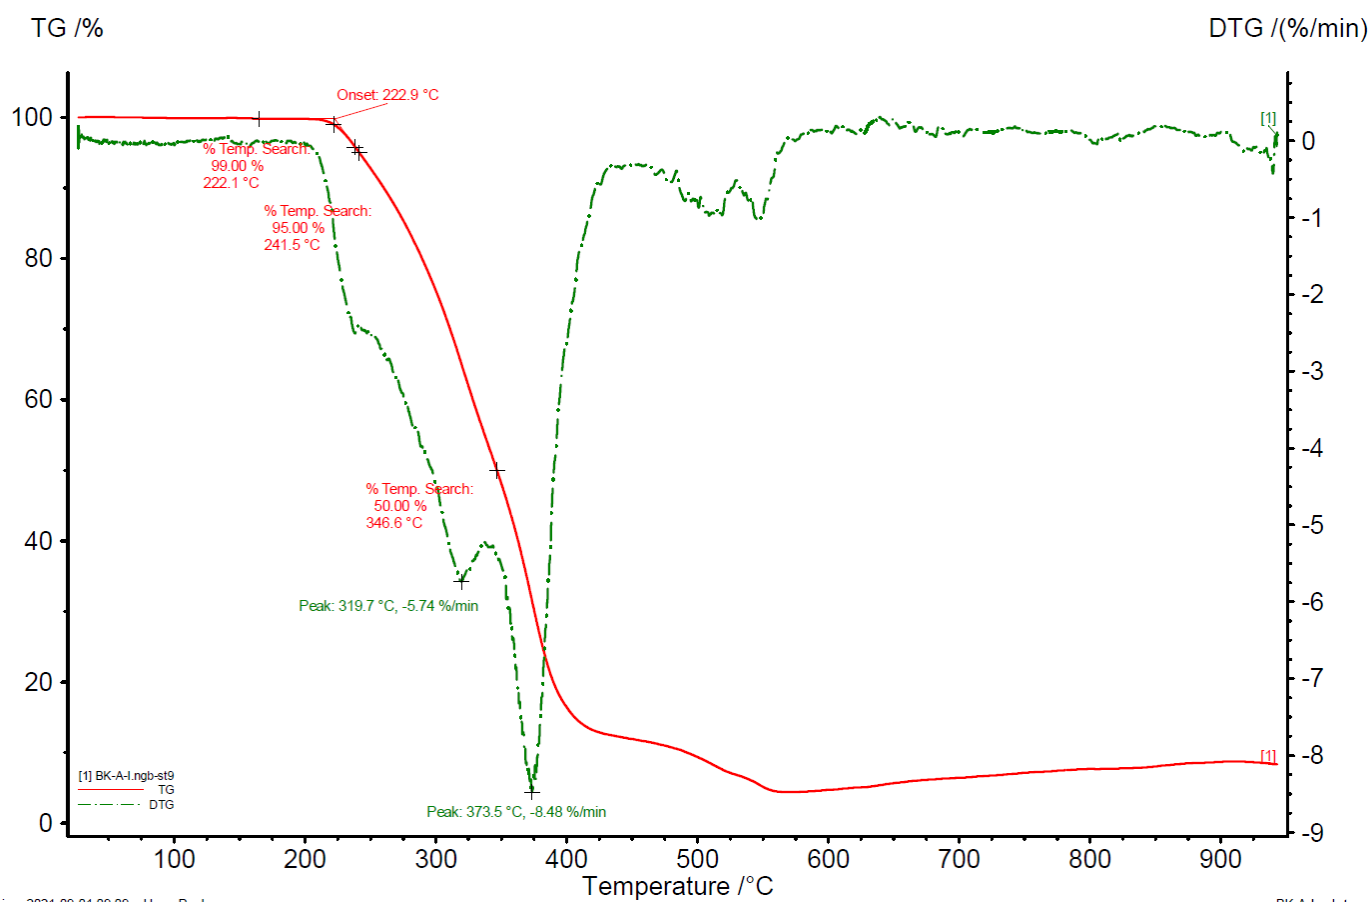

**Figure S7.** The TG and DTG curves of BK-A-I.

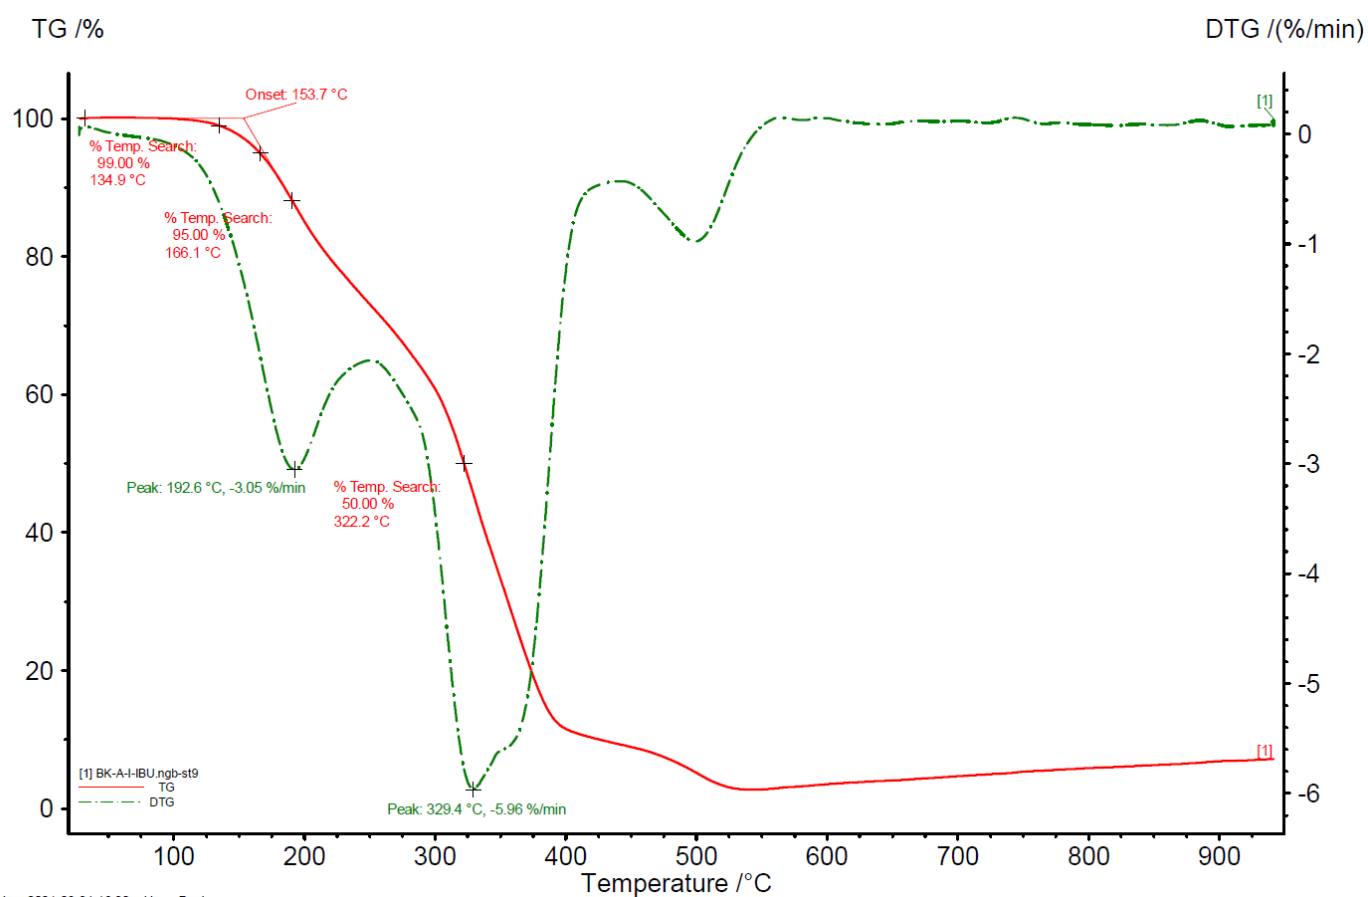

Main 2021-08-31 16:30 User: Paula

**Figure S8.** The TG and DTG curves of BK-A-I-IBU.



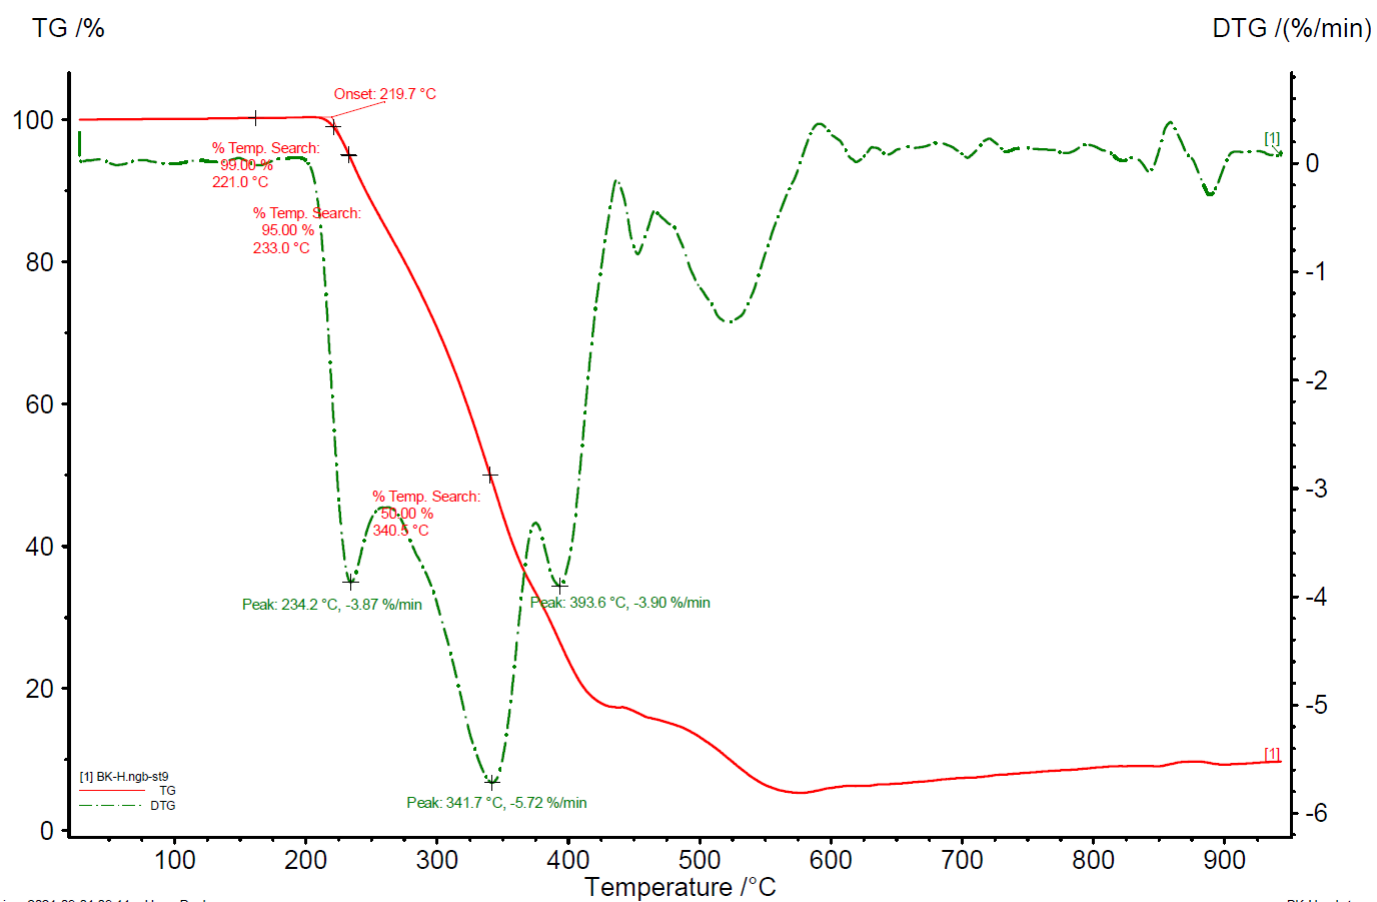

Main 2021-09-01 09:11 User: Paula

BK-H.ngb-taa

**Figure S9.** The TG and DTG curves of BK-H.

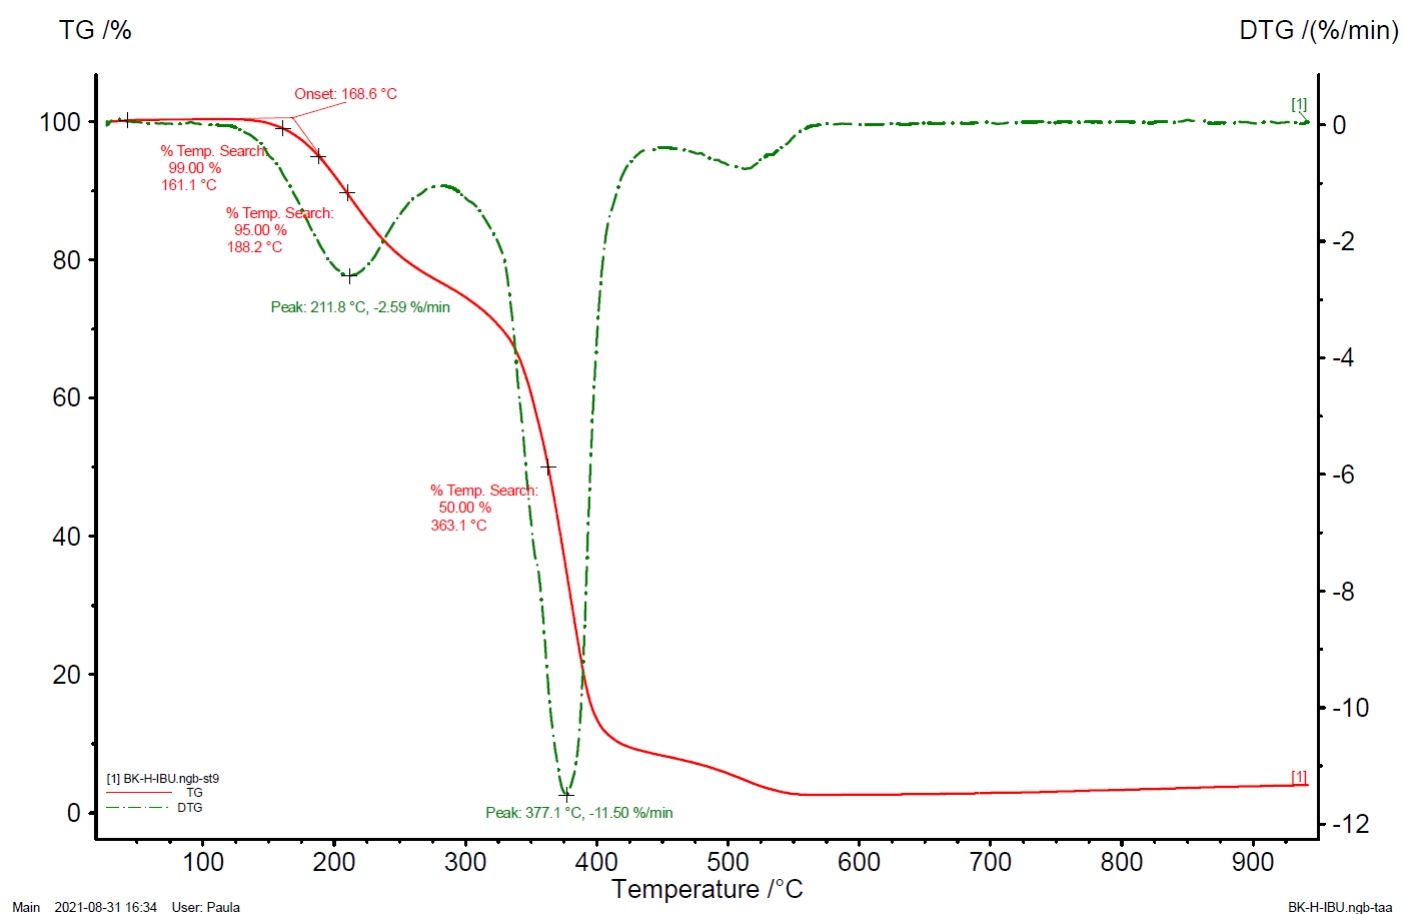

**Figure S10.** The TG and DTG curves of BK-H-IBU.

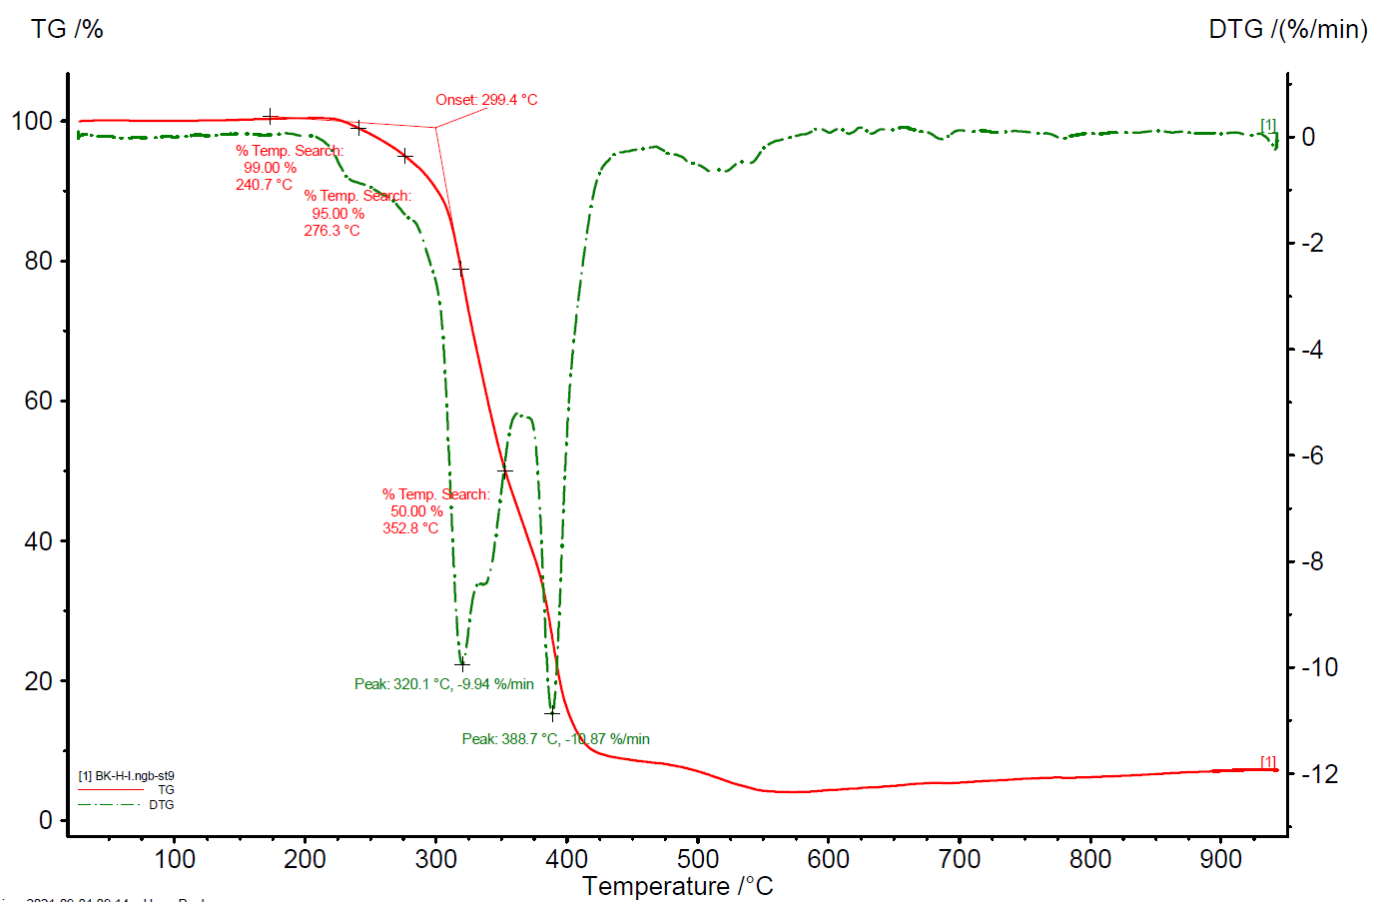

Main 2021-09-01 09:14 User: Paula

**Figure S11.** The TG and DTG curves of BK-H-I.

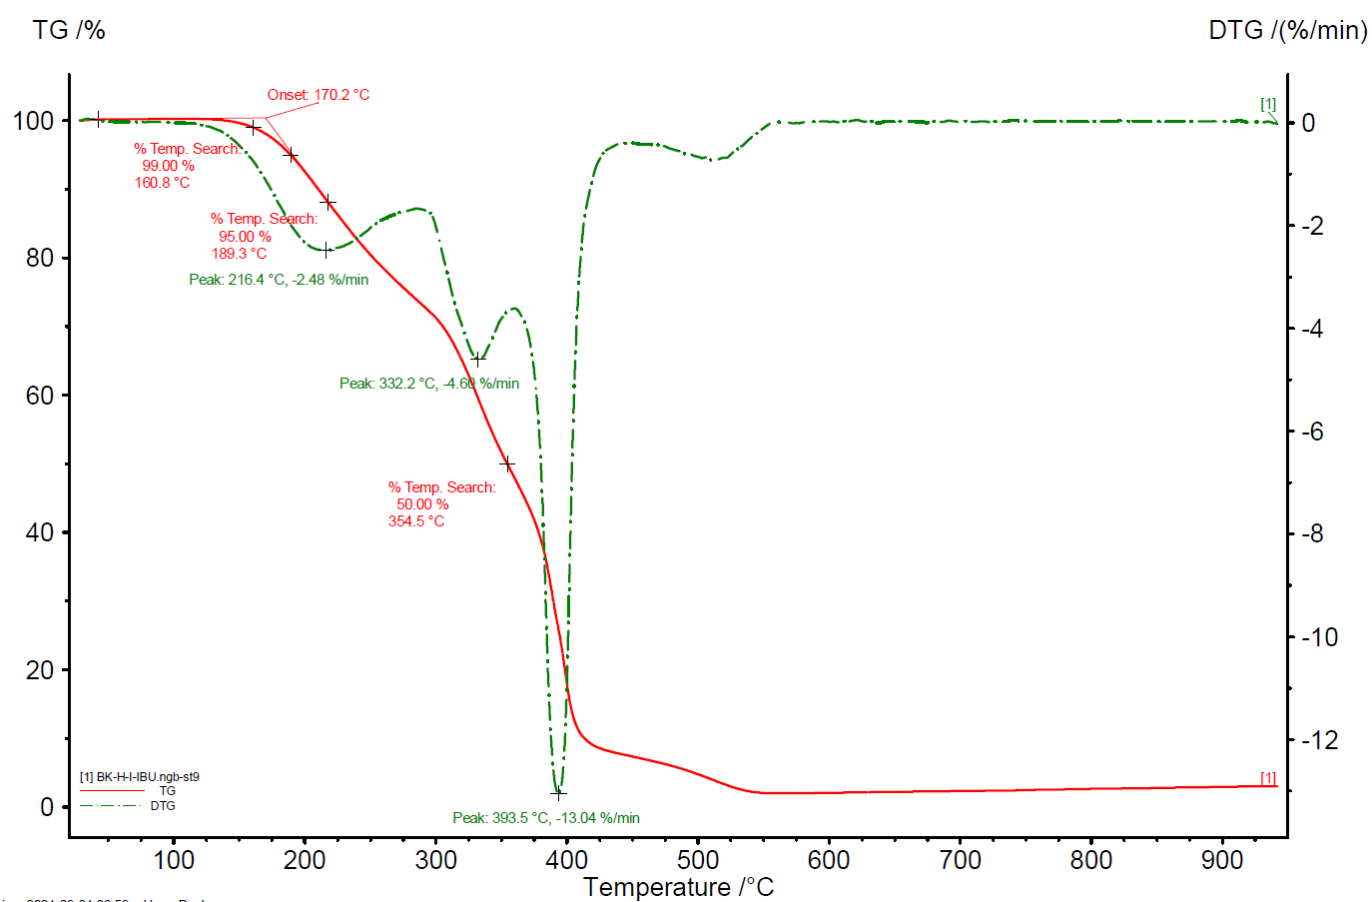

Main 2021-09-01 08:59 User: Paula

**Figure S12.** The TG and DTG curves of BK-H-I-IBU.

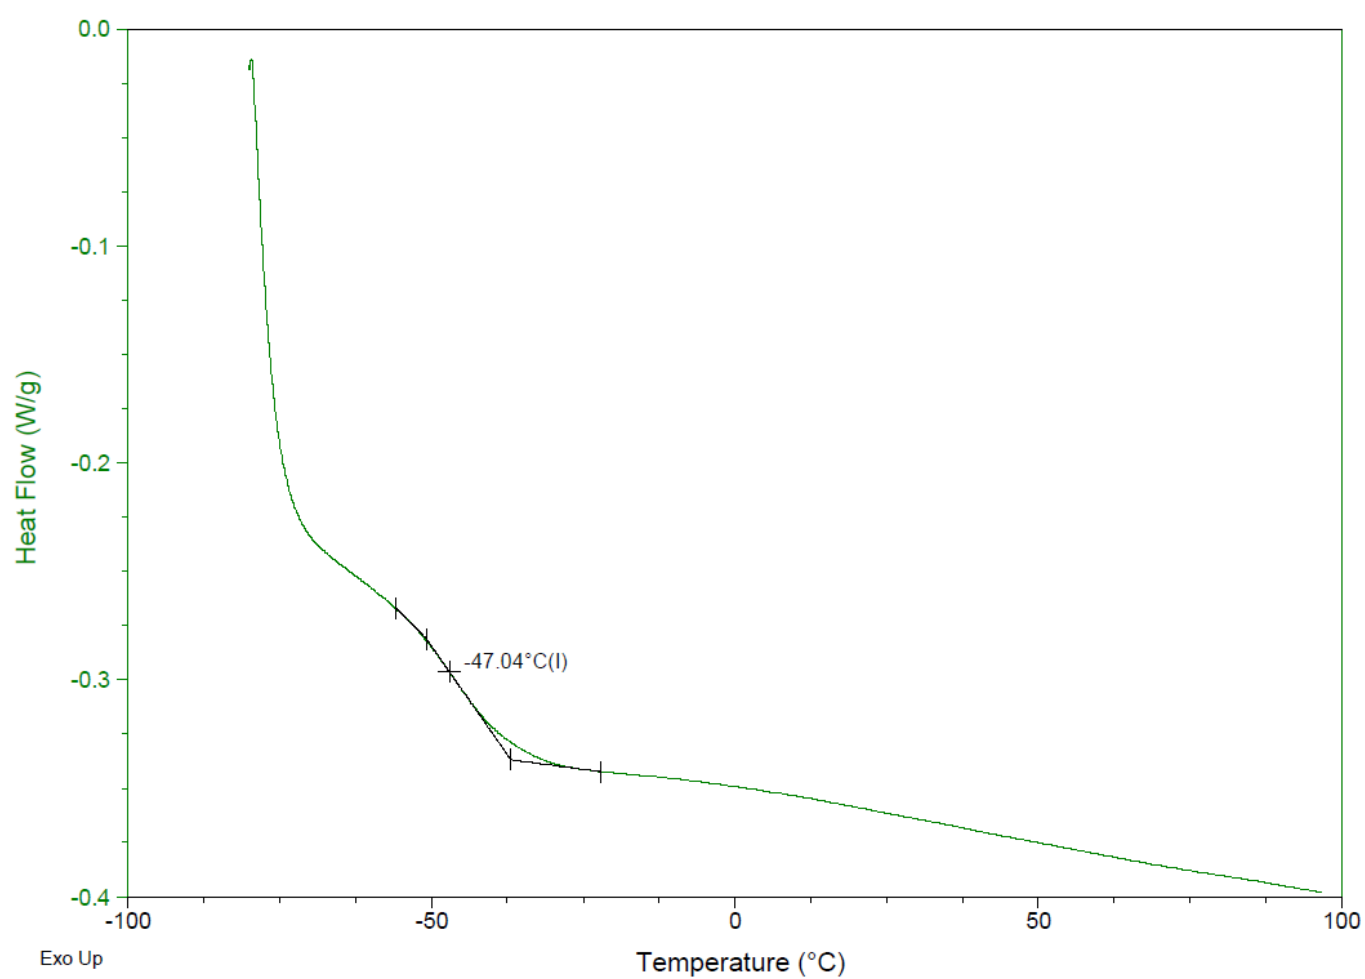

**Figure S13.** The DSC curve of BK-A.

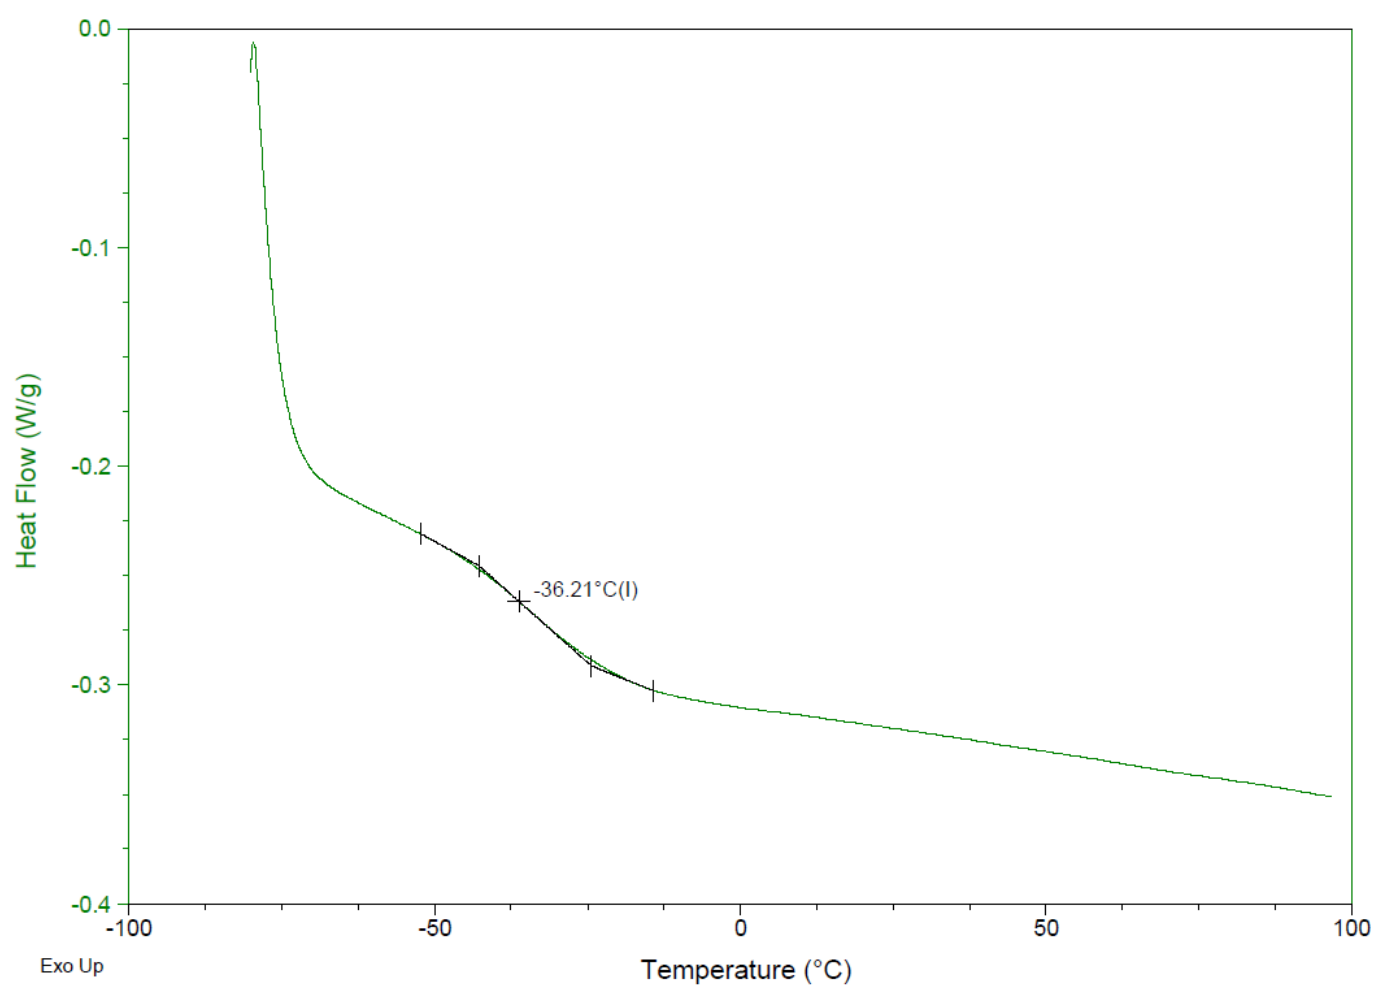

**Figure S14.** The DSC curve of BK-A-I.

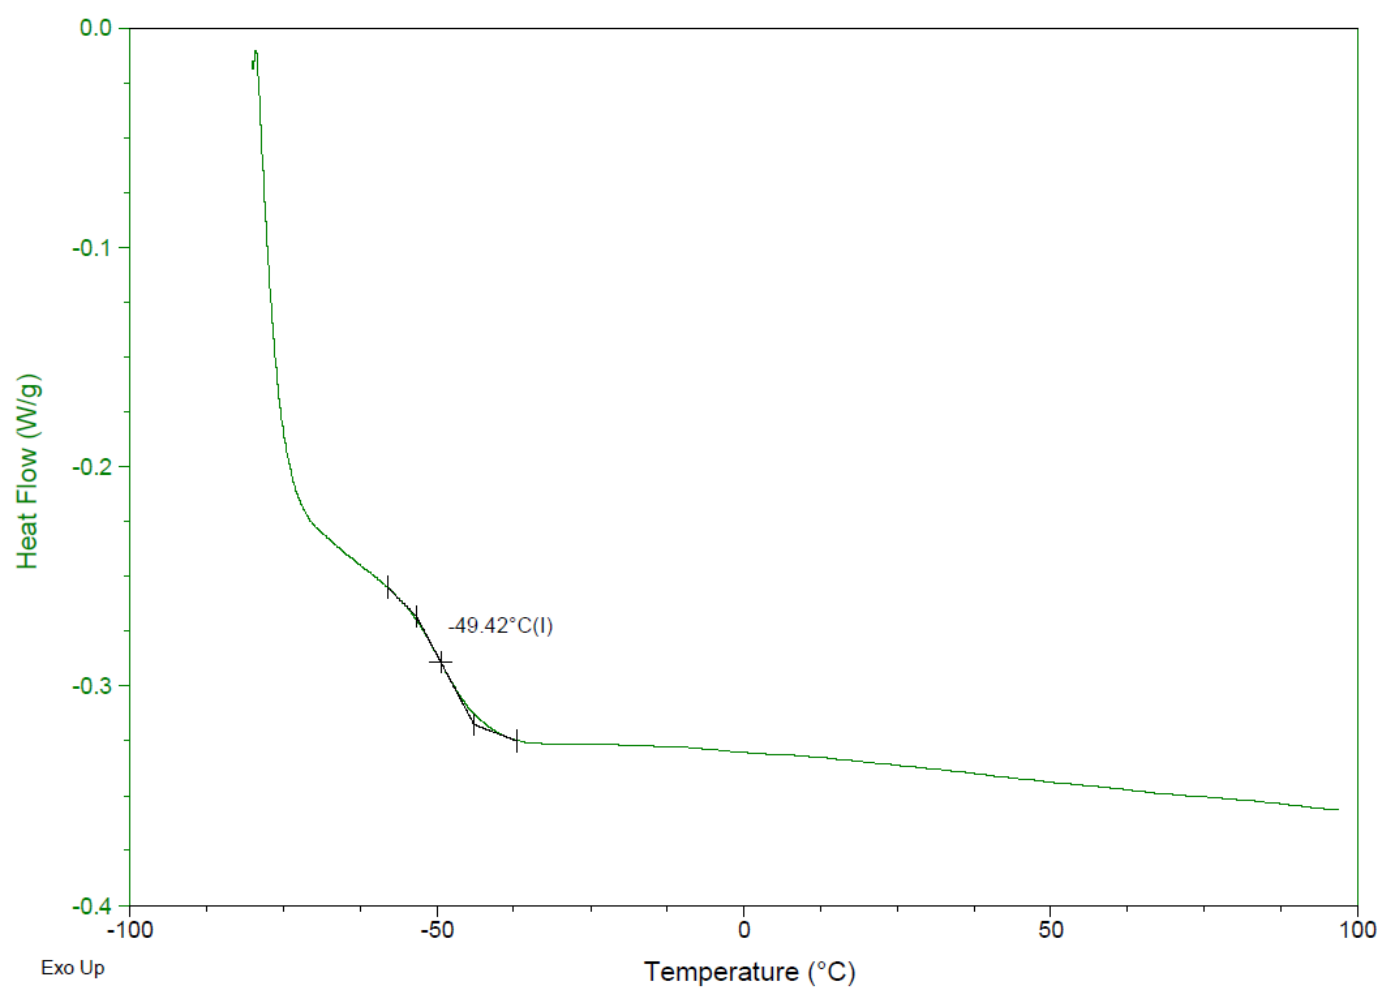

Figure S15. The DSC curve of BK-H.

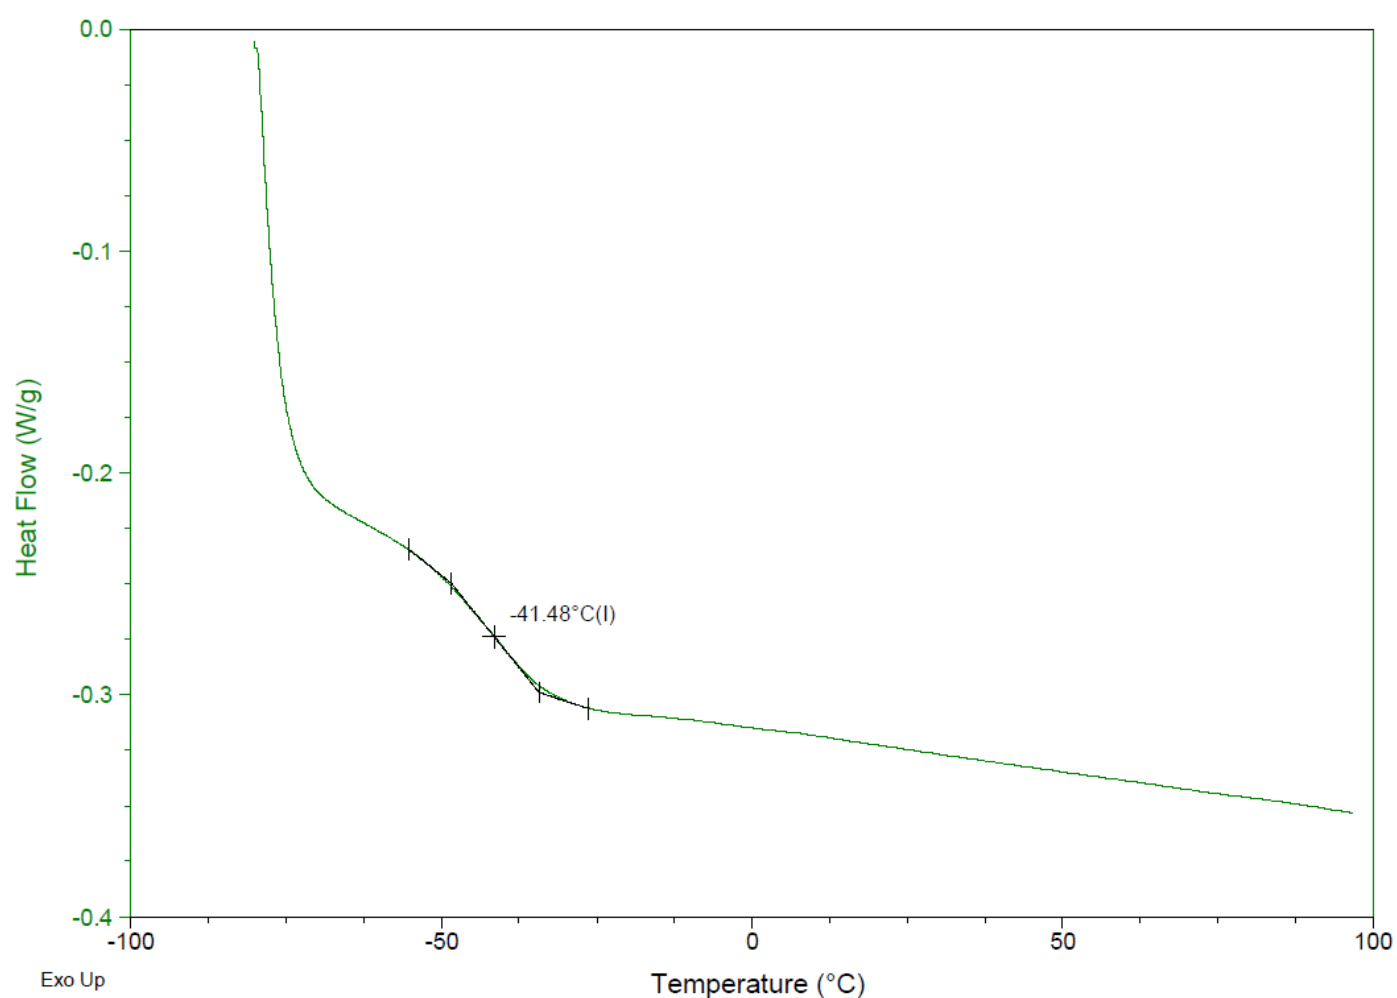

**Figure S16.** The DSC curve of BK-H-I.
